# Supplementary material for: Evaluation of tarsal injuries in C57BL/6J male mice
Source: PubMed Central journal article supplement (PMC10292699; doi:10.1371/journal.pone.0287204), 2023-06-26
Supplement: pone.0287204.s001.pdf [file pone.0287204.s001.pdf]

# Supplemental 1 Table

| List of Excluded Pathogens                     |                                                 |
|------------------------------------------------|-------------------------------------------------|
| Viruses                                        |                                                 |
| Ectromelia Virus                               | Pneumonia virus of mice                         |
| GDVII virus                                    | Polyoma virus                                   |
| Hantaan virus                                  | Reovirus 3                                      |
| K virus                                        | Rotavirus                                       |
| LDH elevating virus                            | Sendai virus                                    |
| Lymphocytic choriomeningitis                   | Mouse minute virus                              |
| Mouse adenovirus                               | Mouse norovirus                                 |
| Mouse cytomegalovirus                          | Mouse parvovirus                                |
| Murine chapparovirus                           | Mouse thymic virus                              |
| Mouse hepatitis virus                          |                                                 |
| Bacteria and Mycoplasma                        |                                                 |
| <i>Bordetella spp</i>                          | <i>Filocaterium rodentium</i>                   |
| <i>Citrobacter rodentium</i>                   | <i>Mycoplasma pulmonis</i>                      |
| <i>Clostridium piliforme</i>                   | <i>Mycoplasma spp.</i>                          |
| <i>Corybacterium bovis</i>                     | <i>Salmonells spp.</i>                          |
| <i>Corynebacterium kutscheri</i>               | <i>Streptobacillus moniliformis</i>             |
| Parasites                                      |                                                 |
| <i>Encephalitozoon cuniculi</i>                | Follicle mites                                  |
| Ectoparasites (fleas, lice, mites)             | Protozoa (Giardia, Spironucleus, etc)           |
| Endoparasites (tapeworms, pinworms, helminths) | <i>Toxoplasma gondii</i>                        |
| Opportunistic Organisms Monitored              |                                                 |
| Dematophytes                                   | <i>Pseudomonas aeruginosa</i>                   |
| <i>Helicobacter spp.</i>                       | <i>Staphylococcus aureus</i>                    |
| <i>Klebsiella pneumoniae</i>                   | <i>Streptococcus pneumoniae</i>                 |
| <i>Klebsiella oxytoca</i>                      | Beta-hemolytic Streptococcus spp. (non-group D) |
| <i>Pasteurella multocida</i>                   | Trichomonads                                    |
| <i>Rodentibacter pneumotropicus</i>            | <i>Yersinia enterocolitica</i>                  |
| <i>Pneumocystis murina</i>                     | <i>Yersinia pseudotuberculosis</i>              |
| <i>Proteus mirabilis</i>                       |                                                 |
